# Supplementary material
Source: Springer Nature journal article supplement (https://www.springermedizin.de/resource/supplementary/13012_2014_852_MOESM4_ESM.pdf/9630610)
Supplement: MOESM4 [file 9630610]

# PROPOSED SIC STUDY

CC

MST

MDFT

*Retrospective Item Analysis*

CC-SIC

MST-SIC

MDFT-SIC

Sites  
( $n \geq 15$ )

Sites  
( $n \geq 15$ )

Sites  
( $n \geq 15$ )

*Qualitative Analysis: Successful and Failed Sites*
